# Supplementary material
Source: Springer Nature journal article supplement (https://www.springermedizin.de/resource/supplementary/12913_2013_3033_MOESM4_ESM.pdf/9533354)
Supplement: MOESM4 [file 9533354]

Percentage of 98 respondent hospitals

0 20 40 60 80 100

**Methods for ordering non-stock medicines by ward staff**

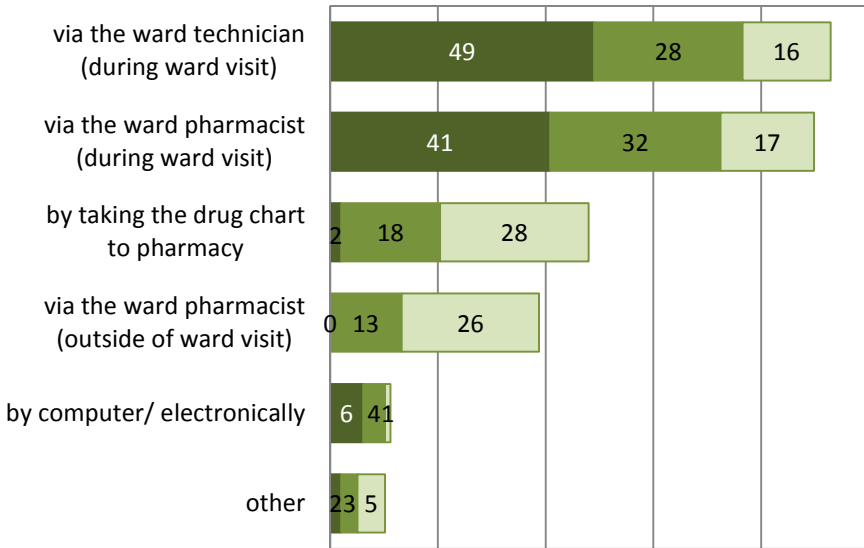

■ Most common   ■ 2nd most common   ■ 3rd most common
